# Supplementary material
Source: PubMed Central journal article supplement (PMC4084745)

## Trends of infection-related hospitalization rates in a large Canadian cohort of chronic dialysis patients accounting for dialysis-vintage

|                               |                                                                                                                                                                                                                                                                                                                                                                                                                                                                                                                                                                                                                                                                                                                                                                                                                                                                                                                                                                                                                                                                                                                                                                                                                                                                                                                                                                                                                                                                                                                                                                                                                                                                                                                                                                                                                                                             |
|-------------------------------|-------------------------------------------------------------------------------------------------------------------------------------------------------------------------------------------------------------------------------------------------------------------------------------------------------------------------------------------------------------------------------------------------------------------------------------------------------------------------------------------------------------------------------------------------------------------------------------------------------------------------------------------------------------------------------------------------------------------------------------------------------------------------------------------------------------------------------------------------------------------------------------------------------------------------------------------------------------------------------------------------------------------------------------------------------------------------------------------------------------------------------------------------------------------------------------------------------------------------------------------------------------------------------------------------------------------------------------------------------------------------------------------------------------------------------------------------------------------------------------------------------------------------------------------------------------------------------------------------------------------------------------------------------------------------------------------------------------------------------------------------------------------------------------------------------------------------------------------------------------|
| Journal:                      | <i>CMAJ Open</i>                                                                                                                                                                                                                                                                                                                                                                                                                                                                                                                                                                                                                                                                                                                                                                                                                                                                                                                                                                                                                                                                                                                                                                                                                                                                                                                                                                                                                                                                                                                                                                                                                                                                                                                                                                                                                                            |
| Manuscript ID:                | CMAJOpen-2012-0027                                                                                                                                                                                                                                                                                                                                                                                                                                                                                                                                                                                                                                                                                                                                                                                                                                                                                                                                                                                                                                                                                                                                                                                                                                                                                                                                                                                                                                                                                                                                                                                                                                                                                                                                                                                                                                          |
| Manuscript Type:              | Cohort (retrospective)                                                                                                                                                                                                                                                                                                                                                                                                                                                                                                                                                                                                                                                                                                                                                                                                                                                                                                                                                                                                                                                                                                                                                                                                                                                                                                                                                                                                                                                                                                                                                                                                                                                                                                                                                                                                                                      |
| Date Submitted by the Author: | 21-Nov-2012                                                                                                                                                                                                                                                                                                                                                                                                                                                                                                                                                                                                                                                                                                                                                                                                                                                                                                                                                                                                                                                                                                                                                                                                                                                                                                                                                                                                                                                                                                                                                                                                                                                                                                                                                                                                                                                 |
| Complete List of Authors:     | Lafrance, Jean-Philippe; Hôpital Maisonneuve-Rosemont, Service de néphrologie<br>Rahme, Elham; Research Institute for McGill University Health Centre ,<br>Medicine<br>Iqbal, Sameena; McGill University Health Centre, nephrology<br>Elftouh, Naoual; Hôpital Maisonneuve-Rosemont, Service de néphrologie<br>Laurin, Louis-Philippe; Hôpital Maisonneuve-Rosemont, Service de<br>néphrologie<br>Vallée, Michel; Hôpital Maisonneuve-Rosemont, Service de néphrologie                                                                                                                                                                                                                                                                                                                                                                                                                                                                                                                                                                                                                                                                                                                                                                                                                                                                                                                                                                                                                                                                                                                                                                                                                                                                                                                                                                                      |
| Keywords:                     | Epidemiology, Infectious diseases, Nephrology                                                                                                                                                                                                                                                                                                                                                                                                                                                                                                                                                                                                                                                                                                                                                                                                                                                                                                                                                                                                                                                                                                                                                                                                                                                                                                                                                                                                                                                                                                                                                                                                                                                                                                                                                                                                               |
| More Detailed Keywords:       |                                                                                                                                                                                                                                                                                                                                                                                                                                                                                                                                                                                                                                                                                                                                                                                                                                                                                                                                                                                                                                                                                                                                                                                                                                                                                                                                                                                                                                                                                                                                                                                                                                                                                                                                                                                                                                                             |
| Abstract:                     | <p>Background: After cardiovascular disease, infection is the second leading cause of hospitalization among patients receiving chronic dialysis. How dialysis vintage influence infection-related hospitalization (IRH) rates and trends remains unclear. Our objective was to describe IRH rate trends among chronic dialysis patients, with a focus on dialysis vintage.</p> <p>Methods: Using provincial administrative databases, we built a retrospective cohort of all adult chronic dialysis patients (hemodialysis and peritoneal dialysis) between 2001 and 2007. We evaluated IRH rate trends according to dialysis vintage using stratification and standardization.</p> <p>Results: 9822 patients (mean age=66.3±14.7 years, and 40% female) were followed for a median time of 2.1 (1.0-3.9) years. Between 2001 and 2007, IRH remained stable (0.20 to 0.19 /p-y; P=0.7). All-cause hospitalization rates decreased by 23% (1.53 to 1.18 /p-y; P&lt;0.001) and cardiovascular admissions rates by 47% (0.45 to 0.24 /p-y; P&lt;0.001). IRH remained stable throughout dialysis vintage (Pinteraction=0.12). Both all-cause and cardiovascular hospitalizations rates decreased with time on dialysis (Pinteraction&lt;0.001). Standardization of hospitalization rates with age and sex, or dialysis vintage did not change interpretation of trends.</p> <p>Interpretation: We found a decreasing trend of all-cause and cardiovascular hospitalization rates among patients on chronic dialysis, independently of age and sex, or dialysis vintage. Differently, trend of IRH remained stable, leading to an increase of the proportion of admissions related to infections. Hospitalizations are potentially preventable; therefore understanding epidemiology of IRH may inform future studies on prevention of this serious outcome.</p> |

1  
2  
3  
4  
5  
6  
7  
8  
9  
10  
11  
12  
13  
14  
15  
16  
17  
18  
19  
20  
21  
22  
23  
24  
25  
26  
27  
28  
29  
30  
31  
32  
33  
34  
35  
36  
37  
38  
39  
40  
41  
42  
43  
44  
45  
46  
47  
48  
49  
50  
51  
52  
53  
54  
55  
56  
57  
58  
59  
60

SCHOLARONE™  
Manuscripts

Confidential

**Title: Trends of infection-related hospitalization rates in a large Canadian cohort of chronic dialysis patients accounting for dialysis-vintage**

**Authors:**

Jean-Philippe Lafrance<sup>1,2,3</sup>; Elham Rahme<sup>4,5</sup>; Sameena Iqbal<sup>4,6</sup>; Naoual Elftouh<sup>1</sup>; Louis-Philippe Laurin<sup>3</sup>; Michel Vallée<sup>2,3</sup>

**Affiliations:**

1- Centre de recherche Hôpital Maisonneuve-Rosemont, Montréal, Canada

2- Département de Médecine, Université de Montréal, Montréal, Canada

3- Service de néphrologie, Hôpital Maisonneuve-Rosemont, Montréal, Canada

4- Department of Medicine, McGill University, Montreal, Quebec, Canada

5- Research Institute, McGill University Health Centre, Montreal, Quebec, Canada

6- Division of Nephrology, McGill University Health Centre, Montréal, Québec, Canada

**Corresponding Author:**

Jean-Philippe Lafrance

Service de néphrologie, Hôpital Maisonneuve-Rosemont

5415, boul. de l'Assomption

Montréal (Québec)

Canada, H1T 2M4

Phone: 514-252-3400 x7737

Fax: 514-251-7094

Email: jean-philippe.lafrance@umontreal.ca

**Running Title:** Hospitalization rates among dialysis patients

**Word Count:**

Abstract: 235 words; Manuscript: 2499 words

**Abstract**

**Background:** After cardiovascular disease, infection is the second leading cause of hospitalization among patients receiving chronic dialysis. How dialysis vintage influence infection-related hospitalization (IRH) rates and trends remains unclear. Our objective was to describe IRH rate trends among chronic dialysis patients, with a focus on dialysis vintage.

**Methods:** Using provincial administrative databases, we built a retrospective cohort of all adult chronic dialysis patients (hemodialysis and peritoneal dialysis) between 2001 and 2007. We evaluated IRH rate trends according to dialysis vintage using stratification and standardization.

**Results:** 9822 patients (mean age=66.3±14.7 years, and 40% female) were followed for a median time of 2.1 (1.0-3.9) years. Between 2001 and 2007, IRH remained stable (0.20 to 0.19 /p-y;  $P=0.7$ ). All-cause hospitalization rates decreased by 23% (1.53 to 1.18 /p-y;  $P<0.001$ ) and cardiovascular admissions rates by 47% (0.45 to 0.24 /p-y;  $P<0.001$ ). IRH remained stable throughout dialysis vintage ( $P_{interaction}=0.12$ ). Both all-cause and cardiovascular hospitalizations rates decreased with time on dialysis ( $P_{interaction}<0.001$ ). Standardization of hospitalization rates with age and sex, or dialysis vintage did not change interpretation of trends.

**Interpretation:** We found a decreasing trend of all-cause and cardiovascular hospitalization rates among patients on chronic dialysis, independently of age and sex, or dialysis vintage. Differently, trend of IRH remained stable, leading to an increase of the proportion of admissions related to infections. Hospitalizations are potentially preventable; therefore understanding epidemiology of IRH may inform future studies on prevention of this serious outcome.

**Keywords:** Renal Dialysis; Kidney Failure, Chronic; Epidemiology; Hospitalization; Infection; Cardiovascular diseases.

## Introduction

End-stage renal disease (ESRD) is the last stage of kidney failure. ESRD is irreversible; to survive, patients with ESRD require a renal replacement therapy. The two modalities of renal replacement therapy are dialysis (including hemodialysis and peritoneal dialysis) and kidney transplantation. Chronic dialysis is associated with a high burden of morbidity requiring frequent and longer hospital admissions.<sup>1,2</sup> Studies conducted in the United States (US) reported high frequencies of infection-related hospitalizations (IRH) and associated morbidity and mortality in the dialysis population.<sup>1,3-7</sup> While rates of all-cause hospitalization remained fairly stable, rates of IRH among dialysis patients increased by 30.6% between 1994 and 2009 in the US.<sup>1</sup> These findings were at the origin of programs recognizing the need to decrease the use of hemodialysis tunnelled catheters, one of the main causes of infection in this population.<sup>1,8</sup> Similar studies have not been conducted in Canada. US estimates may not apply to the Canadian population because dialysis populations significantly differ between the two countries.<sup>1,8</sup> Among others, varying factors are: demographics (including age and race),<sup>1,8,9</sup> vascular access use,<sup>10</sup> and mortality rates.<sup>1,8</sup> Patients initiating dialysis have a poor five-year survival rate of around 40%.<sup>8</sup> Because patients with major co-morbidities or older patients have a higher mortality rate, patients who survived a few years of dialysis (prevalent patients) greatly differ than patients initiating dialysis (incident patients). Therefore, one could hypothesize that hospitalization rates would decrease with time on dialysis. However, other factors come into play such as catheter removal, arising of cardiovascular and other complications (which would increase hospitalization rates), or kidney transplants. In brief, how IRH rates vary with dialysis vintage when all those factors are combined remains unpredictable and not well described. Because proportion of incident and

1  
2  
3 prevalent patients may change over time, reporting hospitalization rates without controlling for  
4  
5 dialysis vintage may confound results. Until now, trends of IRH rates were usually reported for  
6  
7 prevalent patients and not for incident patients. While the United-States Renal Data System  
8  
9 (USRDS) annual report recently presented data on incident patients, only first-year  
10  
11 hospitalization rates were reported.<sup>1</sup> Because IRH are potentially preventable, it is important to  
12  
13 assess their frequency and associated risk factors to inform prevention strategies aiming to  
14  
15 improve patient care.  
16  
17

18  
19 The aim of this study was to describe population-based incidence rate trends from 2001 to 2007  
20  
21 of IRH among incident and prevalent dialysis patients, with a focus on dialysis vintage.  
22  
23

## 24 **Methods**

### 25 *Study population and data sources*

26  
27 We obtained data from provincial health services administrative databases. Virtually all eight  
28  
29 millions residents of Québec, Canada, are covered for their physician and hospital services by a  
30  
31 universal single-payer health care system (*Régie de l'assurance maladie du Québec*, RAMQ). The  
32  
33 RAMQ physician fee-for-service claims databases include all visits, diagnosis codes (*International*  
34  
35 *Classification of Diseases, 9<sup>th</sup> Revision*, ICD-9) and procedures during in- or outpatient  
36  
37 encounters. Primary diagnoses (coded by medical archivists using ICD-9 or ICD-10 after 2006) for  
38  
39 each hospitalization was obtained from the hospital discharge summary database. Discharge  
40  
41 summary data in Quebec have been validated for a number of conditions including hip  
42  
43 fracture,<sup>11</sup> stroke,<sup>12</sup> myocardial infarction<sup>13</sup> and injuries.<sup>14</sup> For these conditions data accuracy  
44  
45 was generally high.  
46  
47  
48  
49  
50

### 51 *Study cohort*

52  
53 We included in the study cohort all adult ( $\geq 18$  years old) patients who were on chronic dialysis  
54  
55 (hemodialysis or peritoneal dialysis) between January 1, 2001 and December 31, 2007. Both  
56  
57  
58  
59  
60

1  
2  
3 incident (new patients initiating dialysis during the study period) and prevalent (patients already  
4 on dialysis at the beginning of the study) patients were included. While limiting the cohort to  
5  
6 only incident patients would have resulted in a simpler cohort, including prevalent patients  
7  
8 allowed having patients with different dialysis vintages starting in 2001, and therefore was  
9  
10 essential to evaluate trends over the entire study period. We excluded patients who had less  
11  
12 than 90 days of follow-up after chronic dialysis initiation, or had a prior kidney transplant. The  
13  
14 90-day criterion was used to ensure only maintenance dialysis patients were kept and to have a  
15  
16 cohort comparable to other chronic dialysis cohorts. Patients were followed from January 1,  
17  
18 2001 or chronic dialysis initiation until death, kidney transplantation, or end of the study  
19  
20 (December 31, 2007).  
21  
22  
23  
24  
25

#### 26 *Admission categories*

27  
28 We identified all admissions during study follow-up. Hospitalizations at the time of dialysis  
29  
30 initiation were excluded. Each admission was categorized using ICD-9 or -10 according to the  
31  
32 primary diagnosis on the discharge sheet in three mutually exclusive categories: Infection,  
33  
34 cardiovascular, or other cause (see Table S1 for specific codes). While the focus of this study was  
35  
36 IRH, we included cardiovascular hospitalization because it is the principal cause of  
37  
38 hospitalization in that population. Infections were further subdivided in dialysis-related  
39  
40 infections, pneumonia, septicemia, and other infections (see Table S1).  
41  
42  
43  
44

#### 45 *Dialysis vintage*

46  
47 A dialysis vintage status was attributed to each patient for every calendar year. This variable was  
48  
49 categorized according to the number of years the patient has been on dialysis: <1 year, ≥1 and  
50  
51 <2 years, ≥2 and <3 years... If a patient initiated dialysis in the calendar year of interest, he was  
52  
53 attributed the status <1 year. Since we had no access to data before January 1, 1999, patients  
54  
55 with dialysis codes in January 1999 were assumed to have started dialysis in 1998 or before.  
56  
57  
58  
59  
60

1  
2  
3 These patients were categorized as  $\geq 3$  years in 2001,  $\geq 4$  years in 2002,  $\geq 5$  years in 2003, *et*  
4  
5 *cetera*.

#### 6 7 8 *Co-morbidities*

9  
10 Co-morbidities were assessed at the beginning of follow-up using ICD-9 codes in the two years  
11  
12 prior to cohort entry, and included: cardiovascular disease, cerebrovascular disease, congestive  
13  
14 heart failure, chronic pulmonary disease, diabetes, malignancy, and peripheral vascular disease  
15  
16 (see Table S2 for specific codes).

#### 17 18 19 *Statistical analysis*

20  
21 Unadjusted admission rates were calculated by dividing the number of admissions by the total  
22  
23 patient-years (p-y) of follow-up (number of days between dialysis initiation and end of follow-up  
24  
25 summed over all study patients divided by 365.25 days). 95% confidence intervals (CI) for rates  
26  
27 were calculated using a Poisson distribution. Linear trends were tested using the Mantel trend  
28  
29 statistic.<sup>15</sup> Dialysis vintage-standardized rates were produced using the whole cohort person-  
30  
31 time distribution, and using dialysis vintage strata (<1, 1, 2,  $\geq 3$  years) that were common  
32  
33 throughout all calendar years. We also calculated age and sex standardized rates using the same  
34  
35 reference population, and using four age strata (<55, 55-64, 65-74,  $\geq 75$ ). Because of a  
36  
37 prohibitive increase in number of strata, we were not able to calculate adjusted rates for both  
38  
39 dialysis vintage and demographics. However, statistical interaction between dialysis vintage and  
40  
41 calendar time was evaluated by including a multiplicative term (calendar\_year\*dialysis\_vintage)  
42  
43 in a Poisson multivariate regression model. All analyses were done using SAS 9.2 (Cary, North  
44  
45 Carolina).

#### 46 47 48 49 50 51 *Sensitivity analyses*

52  
53 To ensure robustness of hospitalization rates trends with dialysis vintage, we conduct a similar  
54  
55 analysis but using survival-modeling techniques. To model and plot how instantaneous risk of  
56  
57  
58  
59  
60



1  
2  
3 hospitalization varied with time from dialysis initiation (baseline hazard function), a counting-  
4  
5 process Cox regression model for recurrent events with the Breslow estimator was used.<sup>16</sup> We  
6  
7  
8 also redid all analysis where we excluded patients initiating dialysis before January 1999, since  
9  
10 their dialysis initiation date was unknown. Finally, we analyses were redone by dialysis modality.

### 11 12 *Ethical considerations*

13  
14  
15 This study was approved by Maisonneuve-Rosemont Hospital and Government of Québec  
16  
17 (*Commission d'accès à l'information*) ethics committees, and informed consent was waived.

### 18 19 **Results**

20  
21 We included 9822 patients in the cohort (Figure 1). Baseline characteristics are presented in  
22  
23 Table 1. Mean age was 66.3 ( $\pm 14.7$ ) years, 40% were female, and 81% were on hemodialysis at  
24  
25 90 days of follow-up. Diabetes and cardiovascular disease were the most prevalent co-  
26  
27 morbidities at 45% and 41%, respectively. Incident patients (n=6767) represented 69% of the  
28  
29 whole cohort.  
30  
31

32  
33 Patients were followed for a median time of 2.1 (interquartile range (IR): 1.0-3.9) years. During  
34  
35 the entire follow-up, we identified 35 246 admissions. Recurrent admissions for a given patient  
36  
37 were frequent: No admissions, 1181 patients (12%); one admission, 1923 patients (20%); two  
38  
39 admissions, 1645 patients (17%); three or more admissions, 5073 patients (52%). The median  
40  
41 length of stay was 4 days (IR: 1-12 days). Overall rates of admissions are given in Table 2. As  
42  
43 expected, cardiovascular-related hospitalizations were the most frequent (0.354 /p-y), followed  
44  
45 by IRH (0.200 /p-y). Among IRH, dialysis-related infections were the most frequent reason of  
46  
47 hospitalization (0.046 /p-y).  
48  
49  
50

51  
52 Trends of rates by calendar time are shown on Table 3 and Figure 2. While between 2001 and  
53  
54 2007 all-cause hospitalization rates decreased by 23% (1.53 to 1.18 /p-y) ( $P$  trend <0.001) and  
55  
56 cardiovascular admissions rates decreased by 47% (0.45 to 0.24 /p-y) ( $P$  trend <0.001), IRH  
57  
58  
59  
60

1  
2  
3 remained stable ( $P$  trend = 0.73). Therefore, the proportion of admissions related to infections  
4  
5 increased from 13 to 16% of all admissions.  
6

7  
8 As shown on Figure 3, IRH remained fairly stable throughout dialysis vintage ( $P$  trend=0.12).  
9  
10 Differently, all-cause and cardiovascular hospitalizations rates decreased with time on dialysis ( $P$   
11  
12 trend <0.001 for both). For both, most of the downward slope was in the first three years of  
13  
14 dialysis initiation. Findings from these trends were also supported by the modeled baseline  
15  
16 hazard function (Figure 4).  
17

18  
19 Interaction between calendar time and dialysis vintage was not statistically significant for IRH  
20  
21 ( $P=0.85$ ). However, this interaction was statistically significant for all-cause hospitalizations rates  
22  
23 ( $P<0.001$ ), meaning that hospitalization rate trends over calendar years varied with dialysis  
24  
25 vintage categories. Interaction was significant for cardiovascular ( $P=0.04$ ). However, dialysis  
26  
27 vintage-standardized rates were highly similar to unadjusted rates (Table 3), signifying that this  
28  
29 interaction did not influence much trends over time. Age and sex adjusted rates were also very  
30  
31 similar to unadjusted rates (Table 3).  
32  
33

34  
35 The sensitivity analysis where we excluded patients who initiated dialysis before January 1999  
36  
37 led to similar results (data not shown). Trends between hemodialysis and peritoneal patients  
38  
39 were similar (data not shown).  
40  
41

#### 42 **Interpretation**

43  
44 This study describes in a large cohort of Canadian chronic dialysis patients trends of IRH and  
45  
46 impact of dialysis vintage. We found stable rates of IRH, but decreasing rates of all-cause and  
47  
48 cardiovascular hospitalizations over time. Therefore, hospitalization's burden attributable to  
49  
50 infection increased over the years. Similarly, we found decreasing rates of all-cause and  
51  
52 cardiovascular hospitalizations with dialysis vintage, but not with IRH. While we found  
53  
54 interaction between calendar time and dialysis vintage for all-cause and cardiovascular  
55  
56  
57  
58  
59  
60

1  
2  
3 hospitalizations, trends of dialysis-vintage adjusted hospitalization rates were very similar to  
4  
5 unadjusted rates.  
6

7  
8 All-cause and IRH rates among patients on dialysis have not been studied in Canada. The USRDS  
9  
10 annual report showed slightly decreasing all-cause hospitalization rates trends: from 1.97 to  
11  
12 1.90 /p-y between 2001 and 2007.<sup>1</sup> Those rates are higher than what we are reporting, but  
13  
14 comparisons should be use with caution because of case-mix differences between populations,  
15  
16 as dialysis populations significantly differ between countries.<sup>1,8,17</sup> Infection-related and  
17  
18 cardiovascular hospitalizations were also higher in the US at 0.46 /p-y and 0.56 /p-y,  
19  
20 respectively, for hemodialysis patients on 2007.<sup>1</sup> Both rates were relatively stable between 2001  
21  
22 and 2007.<sup>1</sup>  
23  
24

25  
26 Why IRH are not decreasing between 2001 and 2007 remains unclear, and should be the focus  
27  
28 of further studies. It may be explained by increasing prevalence of diabetes in the chronic  
29  
30 dialysis population. Furthermore, despite that vascular access-related bloodstream infections  
31  
32 are recognized as a major cause of infections in the dialysis population and that catheter use  
33  
34 (instead of arteriovenous shunts) is the principal risk factor for those infections, proportion of  
35  
36 catheter use increased from 76.8% to 82.6% among incident hemodialysis patients in Canada  
37  
38 between 2001 and 2009.<sup>8,10,18</sup> Other reported risk factors for IRH are: older age,<sup>19-21</sup> female sex,<sup>21</sup>  
39  
40 black race,<sup>19,20</sup> no insurance,<sup>19</sup> smoking,<sup>22</sup> diabetes,<sup>5,19-21,23</sup> high co-morbidity score,<sup>5</sup> heart  
41  
42 failure,<sup>21</sup> pulmonary disease,<sup>21</sup> lower serum albumin,<sup>5,19-21</sup> decreased hematocrit levels,<sup>24</sup> higher  
43  
44 use of erythropoietin,<sup>24</sup> and corticosteroid use.<sup>22</sup>  
45  
46  
47  
48

49  
50 Decreasing trends in all-cause hospitalizations over calendar time may be explained by the fact  
51  
52 that some interventions, such as vascular access or cardiovascular procedures, which used to be  
53  
54 done in an inpatient setting, are now done in an outpatient setting. Decreasing trends in  
55  
56  
57  
58  
59  
60

1  
2  
3 cardiovascular hospitalizations may be due to more aggressive treatment of cardiovascular risk  
4 factors such as hyperlipidemia and hypertension.  
5  
6

7  
8 Very few studies evaluated hospitalization incidence through dialysis vintages. USRDS annual  
9 reports suggests that hospitalization rates are higher in the first year of dialysis.<sup>1</sup> Another study  
10 showed that above 50% of patients initiating dialysis are hospitalized in the first 100 days.<sup>2</sup> Our  
11 results add to those reports by showing that while rates mostly decrease after the first year,  
12 they continue to decrease for at least the first four years after initiation of dialysis. The first year  
13 of dialysis is believed to be at greater risk of morbidity and mortality than subsequent years.<sup>1</sup>  
14 This may due to higher use of catheter in that period or dialysis prescription adjustment.<sup>18</sup> This  
15 phenomenon may also be explained by a survival effect. Patients with severe concurrent  
16 conditions will die early while patients remaining after a few years may be healthier. Because  
17 patients with high co-morbidities are hospitalized more often, rates of hospitalizations would be  
18 higher in the first years when those patients are still in the cohort.  
19  
20  
21  
22  
23  
24  
25  
26  
27  
28  
29  
30  
31  
32

33 Our study has several strengths. First, we were able to follow patients in their first 90 days after  
34 dialysis initiation. This high-risk period is often excluded from studies because hospitalizations  
35 are not covered in other datasets. Second, a universal health care setting allowed inclusion of all  
36 chronic dialysis patients in the province with minimal selection bias.  
37  
38  
39  
40  
41

42 As most retrospective studies, our study has several limitations. First, because we relied on  
43 claims and ICD-9 codes to identify dialysis patients, we may have missed some patients on  
44 chronic dialysis. However, validity of identifying dialysis patients through procedure billing  
45 claims in the RAMQ is thought to be high, since multiple treatments are performed.  
46  
47  
48  
49  
50

51 Unfortunately, we had no access to data before 1999. However, excluding patients who initiated  
52 dialysis before that date yielded similar results. Because of prohibitive numbers of strata, we are  
53 not able to adjust for age and sex in addition to dialysis vintage. Adjustment using a multivariate  
54  
55  
56  
57  
58  
59  
60

1  
2  
3 model would be an alternative to overcome this issue, but would only give an estimate of the  
4  
5 trend and not actual rates, which are a lot easier to interpret clinically. Nevertheless, age  
6  
7 distribution and sex proportion did not change significantly during the observed period. In  
8  
9 addition, age-sex adjusted rates were almost identical to unadjusted rates, which confirms  
10  
11 previous findings where hospitalization rates were similar between elderly and younger patients  
12  
13 on hemodialysis.<sup>1,25</sup> While many factors may change over time and with dialysis vintage, the goal  
14  
15 of this analysis was to evaluate the resulting effect on IRH of those changes occurring with  
16  
17 dialysis vintage. Adjusting for intermediate factors such as co-morbidities could take away the  
18  
19 effect from dialysis vintage. Further studies are needed to investigate mechanisms or explaining  
20  
21 factors between dialysis vintage and IRH rates.  
22  
23

24  
25  
26 In summary, we found a decreasing trend of all-cause and cardiovascular hospitalization rates  
27  
28 among patients on chronic dialysis, independently of age and sex, or dialysis vintage. Differently,  
29  
30 trend of IRH remained stable over time, leading to an increase of the proportion of admissions  
31  
32 related to infections from 13 to 16% of all admissions. While both all-cause and cardiovascular  
33  
34 hospitalizations rates decreased with dialysis vintage, IRH rates remained stable. Understanding  
35  
36 epidemiology of IRH among patients receiving chronic dialysis may inform future studies on  
37  
38 prevention of this common and serious outcome.  
39  
40  
41

#### 42 **Acknowledgements:**

43  
44 This work was supported by a Fonds de la recherche en santé du Québec (FRSQ) operating  
45  
46 grant. Dr. Lafrance is supported by a KRESCENT New Investigator Award.  
47  
48

#### 49 **Disclosure**

50  
51 None to declare.  
52  
53  
54  
55  
56  
57  
58  
59  
60

**References**

1. U.S. Renal Data System. *USRDS 2011 Annual Data Report: Atlas of Chronic Kidney Disease and End-Stage Renal Disease in the United States*. Bethesda, MD: National Institutes of Health, National Institute of Diabetes and Digestive and Kidney Diseases;2011.
2. Quinn MP, Cardwell CR, Rainey A, et al. Patterns of hospitalisation before and following initiation of haemodialysis: a 5 year single centre study. *Postgrad Med J*. Jun 2011;87(1028):389-393.
3. Chavers BM, Solid CA, Gilbertson DT, Collins AJ. Infection-related hospitalization rates in pediatric versus adult patients with end-stage renal disease in the United States. *J Am Soc Nephrol*. Mar 2007;18(3):952-959.
4. Rayner HC, Pisoni RL, Bommer J, et al. Mortality and hospitalization in haemodialysis patients in five European countries: results from the Dialysis Outcomes and Practice Patterns Study (DOPPS). *Nephrol Dial Transplant*. Jan 2004;19(1):108-120.
5. Allon M, Depner TA, Radeva M, et al. Impact of Dialysis Dose and Membrane on Infection-Related Hospitalization and Death: Results of the HEMO Study. *J Am Soc Nephrol*. July 1, 2003 2003;14(7):1863-1870.
6. Allon M, Radeva M, Bailey J, et al. The spectrum of infection-related morbidity in hospitalized haemodialysis patients. *Nephrol Dial Transplant*. Jun 2005;20(6):1180-1186.
7. Dalrymple LS, Mohammed SM, Mu Y, et al. Risk of cardiovascular events after infection-related hospitalizations in older patients on dialysis. *Clin J Am Soc Nephrol*. Jul 2011;6(7):1708-1713.

- 1  
2  
3  
4  
5  
6  
7  
8  
9  
10  
11  
12  
13  
14  
15  
16  
17  
18  
19  
20  
21  
22  
23  
24  
25  
26  
27  
28  
29  
30  
31  
32  
33  
34  
35  
36  
37  
38  
39  
40  
41  
42  
43  
44  
45  
46  
47  
48  
49  
50  
51  
52  
53  
54  
55  
56  
57  
58  
59  
60
8. Canadian Institute for Health Information. *Treatment of End-Stage Organ Failure in Canada, 2000 to 2009 (2011 Annual Report)*. Ottawa: CIHI;2011.
9. Canaud B, Tong L, Tentori F, et al. Clinical Practices and Outcomes in Elderly Hemodialysis Patients: Results from the Dialysis Outcomes and Practice Patterns Study (DOPPS). *Clin J Am Soc Nephrol*. July 1, 2011 2011;6(7):1651-1662.
10. Ethier J, Mendelssohn DC, Elder SJ, et al. Vascular access use and outcomes: an international perspective from the Dialysis Outcomes and Practice Patterns Study. *Nephrol Dial Transplant*. Oct 2008;23(10):3219-3226.
11. Levy AR, Mayo NE, Grimard G. Rates of transcervical and pertrochanteric hip fractures in the province of Quebec, Canada, 1981-1992. *Am J Epidemiol*. Aug 15 1995;142(4):428-436.
12. Mayo NE, Goldberg MS, Levy AR, Danys I, Korner-Bitensky N. Changing rates of stroke in the province of Quebec, Canada: 1981-1988. *Stroke*. May 1991;22(5):590-595.
13. Jollis JG, Ancukiewicz M, DeLong ER, Pryor DB, Muhlbaier LH, Mark DB. Discordance of databases designed for claims payment versus clinical information systems. Implications for outcomes research. *Ann Intern Med*. Oct 15 1993;119(8):844-850.
14. Tamblyn R, Reid T, Mayo N, McLeod P, Churchill-Smith M. Using medical services claims to assess injuries in the elderly: sensitivity of diagnostic and procedure codes for injury ascertainment. *J Clin Epidemiol*. Feb 2000;53(2):183-194.
15. Rothman K, Greenland S, Lash T. *Modern Epidemiology*. Third ed. Philadelphia: Lippincott Williams & Wilkins; 2008.
16. Andersen PK, Borgan O, Gill RD, Keiding N. *Statistical Models Based on Counting Processes*. Berlin: Springer; 1993.

- 1  
2  
3  
4  
5  
6  
7  
8  
9  
10  
11  
12  
13  
14  
15  
16  
17  
18  
19  
20  
21  
22  
23  
24  
25  
26  
27  
28  
29  
30  
31  
32  
33  
34  
35  
36  
37  
38  
39  
40  
41  
42  
43  
44  
45  
46  
47  
48  
49  
50  
51  
52  
53  
54  
55  
56  
57  
58  
59  
60
17. Goodkin DA, Young EW, Kurokawa K, Prutz KG, Levin NW. Mortality among hemodialysis patients in Europe, Japan, and the United States: case-mix effects. *Am J Kidney Dis*. Nov 2004;44(5 Suppl 2):16-21.
  18. Lafrance JP, Iqbal S, Leloirier J, et al. Vascular access-related bloodstream infections in First Nations, community and teaching Canadian dialysis units, and other centre-level predictors. *Nephron Clin Pract*. 2010;114(3):c204-212.
  19. Powe NR, Jaar B, Furth SL, Hermann J, Briggs W. Septicemia in dialysis patients: incidence, risk factors, and prognosis. *Kidney Int*. Mar 1999;55(3):1081-1090.
  20. Aslam N, Bernardini J, Fried L, Burr R, Piraino B. Comparison of Infectious Complications between Incident Hemodialysis and Peritoneal Dialysis Patients. *Clin J Am Soc Nephrol*. November 2006 2006;1(6):1226-1233.
  21. Dalrymple LS, Johansen KL, Chertow GM, et al. Infection-related hospitalizations in older patients with ESRD. *Am J Kidney Dis*. Sep 2010;56(3):522-530.
  22. Franklin J, Lunt M, Bunn D, Symmons D, Silman A. Risk and predictors of infection leading to hospitalisation in a large primary-care-derived cohort of patients with inflammatory polyarthritis. *Ann Rheum Dis*. Mar 2007;66(3):308-312.
  23. Shah BR, Hux JE. Quantifying the risk of infectious diseases for people with diabetes. *Diabetes Care*. Feb 2003;26(2):510-513.
  24. Nissenson AR, Dylan ML, Griffiths RI, Yu HT, Dubois RW. Septicemia in patients with ESRD is associated with decreased hematocrit and increased use of erythropoietin. *Clin J Am Soc Nephrol*. May 2006;1(3):505-510.
  25. Sun Y, Kassam H, Adeniyi M, et al. Hospital admissions in elderly patients on chronic hemodialysis. *Int Urol Nephrol*. Dec 2011;43(4):1229-1236.



1  
2  
3  
4  
5  
6  
7  
8  
9  
10  
11  
12  
13  
14  
15  
16  
17  
18  
19  
20  
21  
22  
23  
24  
25  
26  
27  
28  
29  
30  
31  
32  
33  
34  
35  
36  
37  
38  
39  
40  
41  
42  
43  
44  
45  
46  
47  
48  
49  
50  
51  
52  
53  
54  
55  
56  
57  
58  
59  
60

Confidential

**Table 1.** Baseline characteristics.

| Baseline characteristics          | N=9822    |
|-----------------------------------|-----------|
| Age (years)                       | 66.3±14.7 |
| Female sex (%)                    | 40        |
| Dialysis modality* (%)            |           |
| Hemodialysis                      | 81        |
| Peritoneal dialysis               | 19        |
| Hospitalization in prior year (%) |           |
| 0                                 | 47        |
| 1                                 | 27        |
| ≥2                                | 26        |
| Co-morbidities (%)                |           |
| Cardiovascular disease            | 41        |
| Cerebrovascular disease           | 7         |
| Chronic pulmonary disease         | 17        |
| Congestive heart failure          | 25        |
| Diabetes                          | 45        |
| Malignancy                        | 13        |
| Peripheral vascular disease       | 24        |

\* Dialysis modality was assigned at cohort entry and was not updated through time.

**Table 2.** Overall hospitalization rates by cause.

|                  | N     | Rate<br>(/person-year) | 95% CI        |
|------------------|-------|------------------------|---------------|
| All causes       | 35246 | 1.352                  | 1.338 , 1.366 |
| Cardiovascular   | 9240  | 0.354                  | 0.347 , 0.362 |
| Infection        | 5209  | 0.200                  | 0.194 , 0.205 |
| Dialysis-related | 1196  | 0.046                  | 0.043 , 0.049 |
| Pneumonia        | 734   | 0.028                  | 0.026 , 0.030 |
| Septicemia       | 578   | 0.022                  | 0.020 , 0.024 |
| Other infection  | 2701  | 0.104                  | 0.100 , 0.108 |
| Other            | 20797 | 0.798                  | 0.787 , 0.809 |

Abbreviation: CI, confidence interval.

Confidential

**Table 3.** Hospitalization rates (per person-year) by calendar year, standardized by age-sex, and dialysis vintage.

| Year           | N    | All causes |                      |                      | Infection |         |         | Cardiovascular |         |         |
|----------------|------|------------|----------------------|----------------------|-----------|---------|---------|----------------|---------|---------|
|                |      | Crude      | Age-sex <sup>*</sup> | Vintage <sup>†</sup> | Crude     | Age-sex | Vintage | Crude          | Age-sex | Vintage |
| 2001           | 4232 | 1.53       | 1.54                 | 1.52                 | 0.20      | 0.20    | 0.20    | 0.45           | 0.45    | 0.45    |
| 2002           | 4383 | 1.42       | 1.42                 | 1.41                 | 0.20      | 0.20    | 0.20    | 0.41           | 0.41    | 0.40    |
| 2003           | 4492 | 1.38       | 1.38                 | 1.38                 | 0.19      | 0.19    | 0.19    | 0.38           | 0.38    | 0.38    |
| 2004           | 4570 | 1.38       | 1.38                 | 1.39                 | 0.21      | 0.21    | 0.21    | 0.39           | 0.39    | 0.39    |
| 2005           | 4753 | 1.32       | 1.32                 | 1.32                 | 0.21      | 0.21    | 0.21    | 0.35           | 0.35    | 0.35    |
| 2006           | 4921 | 1.29       | 1.30                 | 1.31                 | 0.20      | 0.20    | 0.20    | 0.29           | 0.29    | 0.29    |
| 2007           | 4822 | 1.18       | 1.18                 | 1.19                 | 0.19      | 0.19    | 0.19    | 0.24           | 0.24    | 0.24    |
| <i>P</i> trend |      | <0.001     |                      |                      | 0.7       |         |         | <0.001         |         |         |

\* Adjusted for age and sex considering the whole cohort distribution as the reference population.

† Adjusted for dialysis vintage considering the whole cohort distribution as the reference population.

### Legends to Figures

**Figure 1.** Derivation of cohort. Excluded patients with less than 3 months of follow-up represent patients who died or reached end of study period before 90 days.

**Figure 2.** Unadjusted admission rates by calendar years.

**Figure 3.** Unadjusted admission rates by dialysis vintage.

**Figure 4.** Hazard function for all-cause and cause-specific admissions using recurrent hospitalizations (counting-process Cox regression model).

Confidential

## Supplementary Material

Table S1. ICD-9 and ICD-10 codes for infection-related and cardiovascular hospitalizations.

| Definition       | ICD-9 codes                                                                                                                                                                                                                                                                                                                                                                                                                                                                                                                                                                                                                                                                                                                                       | ICD-10 codes                                                                                                                                                                                                                                                                                                                                                                                                                                                                                                                                                                                                                                                                                                                                                                                                                                                                                                                                                                                                                                                                                                                                                                                                   |
|------------------|---------------------------------------------------------------------------------------------------------------------------------------------------------------------------------------------------------------------------------------------------------------------------------------------------------------------------------------------------------------------------------------------------------------------------------------------------------------------------------------------------------------------------------------------------------------------------------------------------------------------------------------------------------------------------------------------------------------------------------------------------|----------------------------------------------------------------------------------------------------------------------------------------------------------------------------------------------------------------------------------------------------------------------------------------------------------------------------------------------------------------------------------------------------------------------------------------------------------------------------------------------------------------------------------------------------------------------------------------------------------------------------------------------------------------------------------------------------------------------------------------------------------------------------------------------------------------------------------------------------------------------------------------------------------------------------------------------------------------------------------------------------------------------------------------------------------------------------------------------------------------------------------------------------------------------------------------------------------------|
| Cardiovascular   | 276.6, 336.1, 362.3, 393-398, 401-405, 410-417, 420, 421.9, 422.90, 422.99, 423-438, 440-448, 451-459, 557, 785.0-785.4, 785.51                                                                                                                                                                                                                                                                                                                                                                                                                                                                                                                                                                                                                   | E87.7, G45-G46, G95.1, H34, I05- I15, I20-I28, I30.0, I30.8-I30.9, I31, I32.8, I33.9, I34-I39, I40.1, I40.8-I40.9, I41.8, I42, I43.1, I43.2, I43.9, I44-I51, I52.8, I60-I87, I89, I95-I96, I98.2, I98.8, I99, K55, M30-M31, R00-R02, R57.0, R58                                                                                                                                                                                                                                                                                                                                                                                                                                                                                                                                                                                                                                                                                                                                                                                                                                                                                                                                                                |
| Infection (all)  | 001-134, 136, 139, 254.1, 320-326, 331.81, 362, 372.0-372.3, 373.0-373.2, 382, 383.0, 386.33, 386.35, 388.60, 390-392, 421.0, 421.1, 422.0, 422.91-422.93, 449, 460-466, 472-473, 474.0, 475, 476.0-476.1, 478.21-478.22, 478.24, 478.29, 480-488, 490, 491.1, 494, 510, 511.0-511.1, 513, 518.6, 519.01, 519.2, 522.5, 522.7, 527.3, 528.3, 540-542, 562.01, 562.03, 562.10, 562.13, 566-567, 569.5, 572.0-572.1, 573.1-573.3, 575.0-575.1, 590, 595.0-595.4, 597, 598.0, 599.0, 601, 603.1, 604, 607.1-607.2, 608.0, 608.4, 611.0, 614-615, 616.0-616.1, 616.3-616.4, 616.8, 639.0, 646.6, 647, 670, 675, 680-686, 695.81, 706.0, 711, 727.89, 728.0, 730.0-730.3, 730.8-730.9, 780.60, 785.52, 790.7-790.8, 958.3, 996.6, 997.62, 998.5, 999.3 | A00-A32, A34-A99, B00-B89, B95-B97, B99, D73.3, E32.1, G00-G02, G04.0, G04.2, G05-G09, G53.1, G63.0, G73.4, G93.7, G94.0, H00, H01.0, H03, H05.0, H06.1, H10.0, H10.2-H10.5, H10.8 -H10.9, H13.0-H13.2, H19.0-H19.2, H22.0, H32.0, H44.0, H60, H62.0-H62.4, H66, H67.0-H67.1, H70.0, H75.0, H83.0, H92.1, H94.0, I00-I02, I30.1, I32.0-I32.1, I33.0, I39, I40.0, I41.0-I41.2, I43.0, I52.0- I52.1, I68.1, I79, I98.0-I98.2, I98.8, J00-J06, J09-J22, J31-J32, J34.0, J35.0, J36-J37, J39.0-J39.1, J40, J41.1, J44.0, J47, J65, J85-J86, K04.6-K04.7, K11.3, K12.2, K23.0, K35-K37, K57.0, K57.2, K57.4, K57.8, K61, K63.0, K65.0, K65.9, K67, K75.0, K77.0, K81, L00-L08, L30.3, L70.2, M00-M01, M03, M46.2-M46.5, M49.0-M49.3, M60.0, M63.0-M63.2, M65.0-M65.1, M68.0, M71.0-M71.1, M86, M90.0-M90.2, N08.0, N10, N11.0-N11.1, N11.8, N12, N13.6, N15.1, N16.0, N29.0-N29.1, N30.0-N30.3, N33-N34, N35.1, N39.0, N41, N43.1, N45, N48.1-N48.2, N49, N51, N61, N70-N74, N75.1, N76.0-N76.4, N77.0-N77.1, N98.0, O03.0, O03.5, O04.0, O04.5, O05.0, O05.5, O08.0, O23, O85, O86, O91, O98, R00, R01, R02, R50.8, R50.9, R57.2, T79.3, T80.2, T81.4, T82.6, T82.7, T83.5-T83.6, T84.5-T84.7, T85.7, T87.4, T88.0 |
| Dialysis-related | 567, 996.62, 996.68, 996.69                                                                                                                                                                                                                                                                                                                                                                                                                                                                                                                                                                                                                                                                                                                       | T82.7, T85.7, K65.0, K65.9                                                                                                                                                                                                                                                                                                                                                                                                                                                                                                                                                                                                                                                                                                                                                                                                                                                                                                                                                                                                                                                                                                                                                                                     |
| Pneumonia        | 480-486, 487.0                                                                                                                                                                                                                                                                                                                                                                                                                                                                                                                                                                                                                                                                                                                                    | J12-J18, J10.0, J11.0, J85.1                                                                                                                                                                                                                                                                                                                                                                                                                                                                                                                                                                                                                                                                                                                                                                                                                                                                                                                                                                                                                                                                                                                                                                                   |
| Septicemia       | 003.1, 022.3, 036.2, 038, 054.5, 112.5, 790.7, 785.52                                                                                                                                                                                                                                                                                                                                                                                                                                                                                                                                                                                                                                                                                             | A40 -A41, O85, A02.1, A22.7, A26.7, A32.7, A39.2, A39.3-A39.4, A42.7, B37.7, R57.2                                                                                                                                                                                                                                                                                                                                                                                                                                                                                                                                                                                                                                                                                                                                                                                                                                                                                                                                                                                                                                                                                                                             |

**Table S2.** ICD-9 and ICD-10 codes for assessment of comorbidities.

| Definition                  | ICD-9 codes                                                                 | ICD-10 codes                                                                                                                                                     |
|-----------------------------|-----------------------------------------------------------------------------|------------------------------------------------------------------------------------------------------------------------------------------------------------------|
| Cardiovascular disease      | 410, 411 (except 411.0), 412, 413.0, 413.9, 414 (except 414.1)              | I21, I24 (except I24.1), I25, I20.0, I20.9, I25 (except I25.3 and I25.4)                                                                                         |
| Cerebrovascular disease     | 430-432, 434, 436, 438, (342, 433, 435, or 438) and V57, 433 and 342, 435   | I60-I62, I64, I66, I69, I73, G45, I63.3-I63.9, G45, G46.0, G46.6, G46.7, (I65, I63.0-I63.2, or I66.3) and Z50, (I65, I63.0-I63.2, or I66.3) and G81, G81 and Z50 |
| Congestive heart failure    | 428, 402.01, 402.11, 402.91, 404.01, 404.11, 404.91, 404.03, 404.13, 404.93 | I50                                                                                                                                                              |
| Chronic pulmonary disease   | 492, 493, 496                                                               | J43, J44, J45                                                                                                                                                    |
| Diabetes                    | 250, 357.2, 362.0, 366.41                                                   | E10 -E14, G63.2, H36.0, H28.0                                                                                                                                    |
| Malignancy                  | 140-209 (except 173)                                                        | C00 -C97 (except C44, C46)                                                                                                                                       |
| Peripheral vascular disease | 250.7, 440.2-440.3, 440.8-440.9, 443, 785.4                                 | E10.5, E11.5, E13.5, E14.5, I70.2, I70.8-I70.9, I73, R02                                                                                                         |

Patients in RAMQ between  
Jan 1, 1999 and Dec 31, 2007  
with  $\geq 1$  dialysis-related code  
(n=26 475)

Excluded (n=16 653)

- Kidney transplant prior to chronic dialysis (n=416)
- End of follow-up before Jan 1, 2001 (n=2866)
- Less than 3 months of follow-up (n=4997)
- Not on maintenance dialysis at 3 months (recovery of kidney function) (n=8374)

Patients included in RAMQ  
cohort (n=9822)



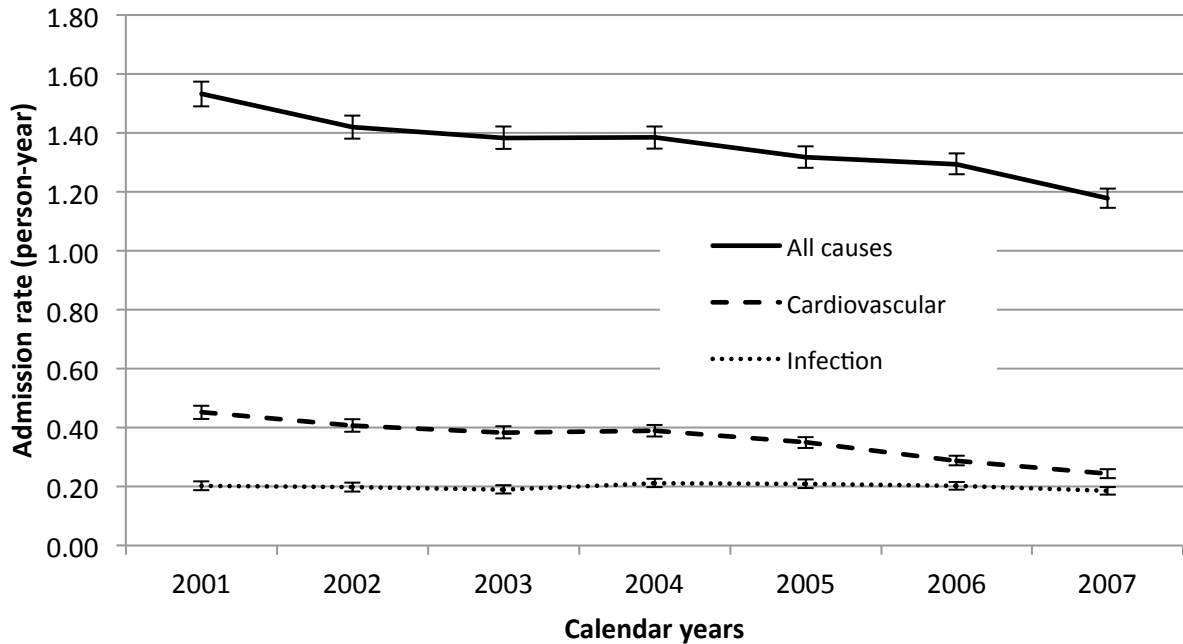

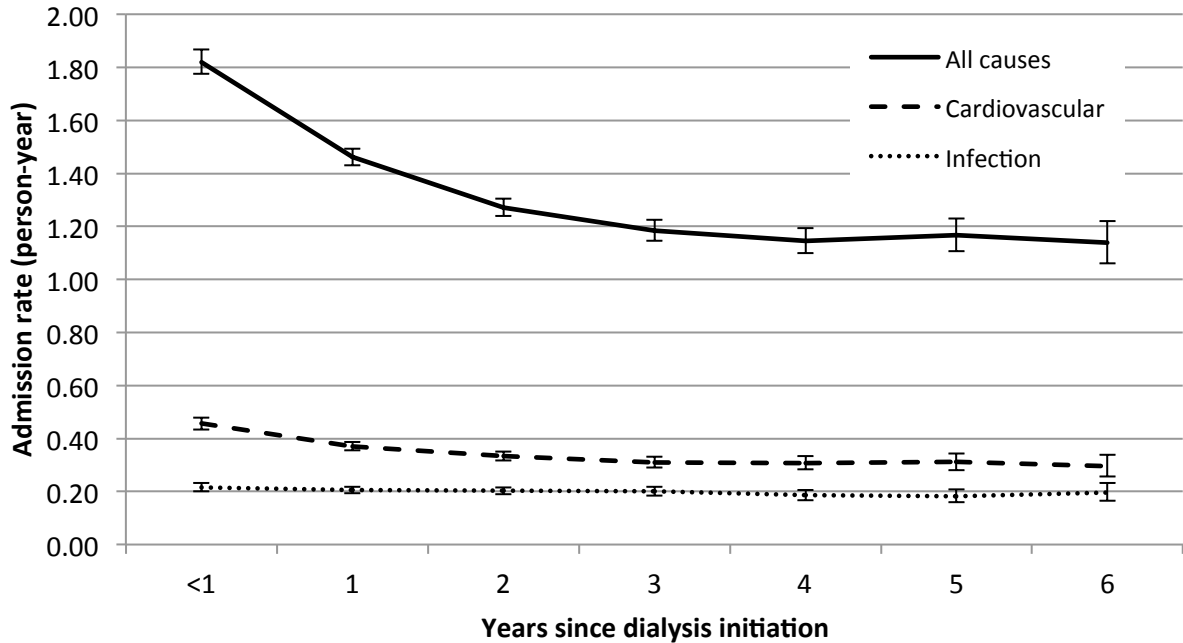

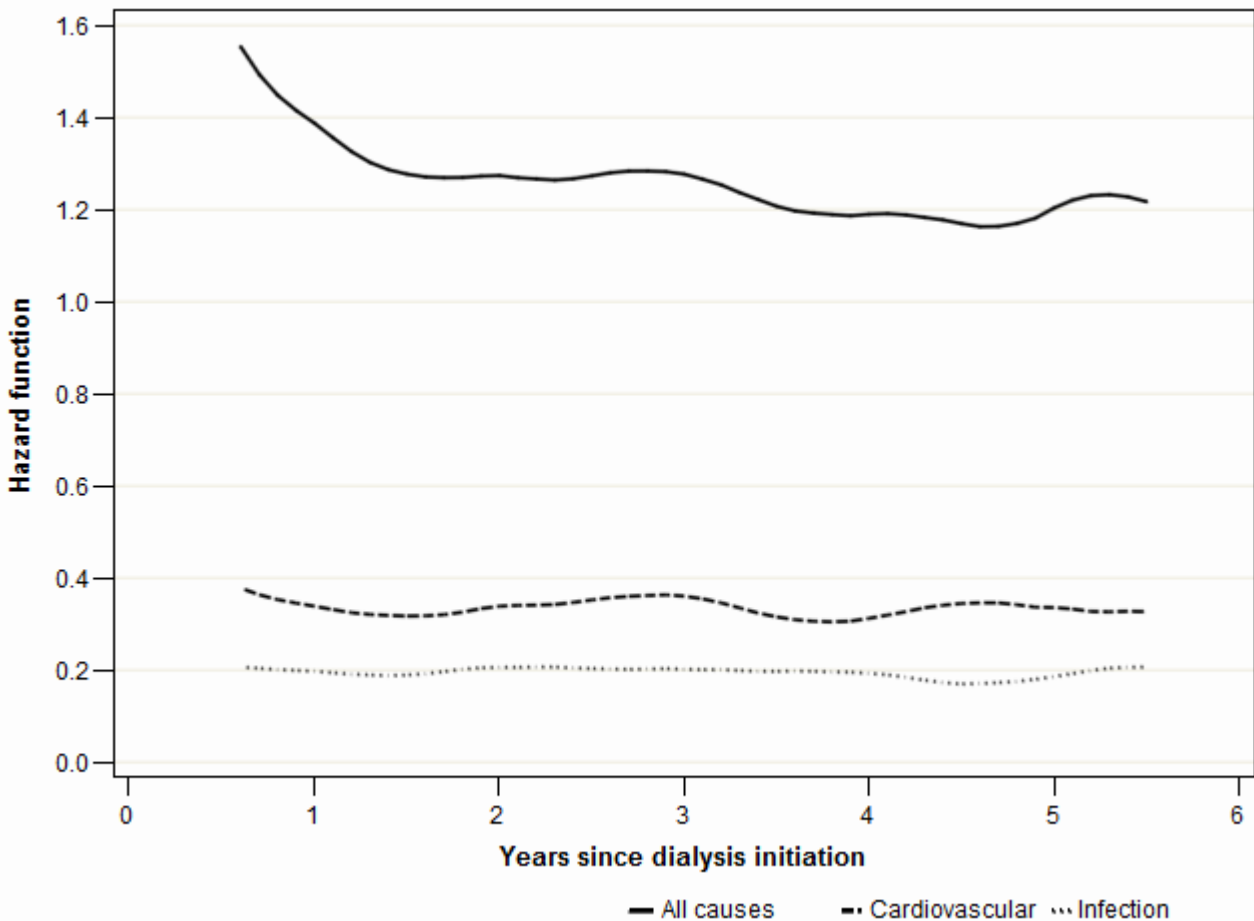

Supplement: supp_2.2.E109_2012-0027_original_submission.pdf [file supp_2.2.E109_2012-0027_original_submission.pdf]
