# Supplementary material
Source: PubMed Central journal article supplement (PMC4084745)
Supplement: supp_2.2.E109_2012-0027-01-at.pdf [file supp_2.2.E109_2012-0027-01-at.pdf]

## Supplementary Material

**Table S1.** ICD-9 and ICD-10 codes for infection-related and cardiovascular hospitalizations.

| <b>Definition</b> | <b>ICD-9 codes</b>                                                                                                                                                                                                                                                                                                                                                                                                                                                                                                                                                                                                                                                                                                                              | <b>ICD-10 codes</b>                                                                                                                                                                                                                                                                                                                                                                                                                                                                                                                                                                                                                                                                                                                                                                                                                                                                                                                                                                                                                                                                                                                                                                                            |
|-------------------|-------------------------------------------------------------------------------------------------------------------------------------------------------------------------------------------------------------------------------------------------------------------------------------------------------------------------------------------------------------------------------------------------------------------------------------------------------------------------------------------------------------------------------------------------------------------------------------------------------------------------------------------------------------------------------------------------------------------------------------------------|----------------------------------------------------------------------------------------------------------------------------------------------------------------------------------------------------------------------------------------------------------------------------------------------------------------------------------------------------------------------------------------------------------------------------------------------------------------------------------------------------------------------------------------------------------------------------------------------------------------------------------------------------------------------------------------------------------------------------------------------------------------------------------------------------------------------------------------------------------------------------------------------------------------------------------------------------------------------------------------------------------------------------------------------------------------------------------------------------------------------------------------------------------------------------------------------------------------|
| Cardiovascular    | 276.6, 336.1, 362.3, 393-398, 401-405, 410-417, 420, 421.9, 422.90, 422.99, 423-438, 440-448, 451-459, 557, 785.0-785.4, 785.51                                                                                                                                                                                                                                                                                                                                                                                                                                                                                                                                                                                                                 | E87.7, G45-G46, G95.1, H34, I05- I15, I20-I28, I30.0, I30.8-I30.9, I31, I32.8, I33.9, I34-I39, I40.1, I40.8-I40.9, I41.8, I42, I43.1, I43.2, I43.9, I44-I51, I52.8, I60-I87, I89, I95-I96, I98.2, I98.8, I99, K55, M30-M31, R00-R02, R57.0, R58                                                                                                                                                                                                                                                                                                                                                                                                                                                                                                                                                                                                                                                                                                                                                                                                                                                                                                                                                                |
| Infection (all)   | 001-134, 136, 139, 254.1, 320-326, 331.81, 362, 372.0-372.3, 373.0-373.2, 382, 383.0, 386.33, 386.35, 388.60, 390-392, 421.0,421.1, 422.0, 422.91-422.93, 449, 460-466, 472-473, 474.0, 475, 476.0-476.1, 478.21-478.22, 478.24, 478.29, 480-488, 490, 491.1, 494, 510, 511.0-511.1, 513, 518.6, 519.01, 519.2,522.5, 522.7, 527.3, 528.3, 540-542, 562.01, 562.03, 562.10, 562.13, 566-567, 569.5, 572.0-572.1, 573.1-573.3, 575.0-575.1, 590, 595.0-595.4, 597, 598.0, 599.0, 601, 603.1, 604, 607.1-607.2, 608.0, 608.4, 611.0, 614-615, 616.0-616.1, 616.3-616.4, 616.8, 639.0, 646.6, 647, 670, 675, 680-686, 695.81, 706.0, 711, 727.89, 728.0, 730.0-730.3, 730.8-730.9, 780.60, 785.52, 790.7-790.8, 958.3, 996.6, 997.62, 998.5, 999.3 | A00-A32, A34-A99, B00-B89, B95-B97, B99, D73.3, E32.1, G00-G02, G04.0, G04.2, G05-G09, G53.1, G63.0, G73.4, G93.7, G94.0, H00, H01.0, H03, H05.0, H06.1, H10.0, H10.2-H10.5, H10.8 -H10.9, H13.0-H13.2, H19.0-H19.2, H22.0, H32.0, H44.0, H60, H62.0-H62.4, H66, H67.0-H67.1, H70.0, H75.0, H83.0, H92.1, H94.0, I00-I02, I30.1, I32.0-I32.1, I33.0, I39, I40.0, I41.0-I41.2, I43.0, I52.0- I52.1, I68.1, I79, I98.0-I98.2, I98.8, J00-J06, J09-J22, J31-J32, J34.0, J35.0, J36-J37, J39.0-J39.1, J40, J41.1, J44.0, J47, J65, J85-J86, K04.6-K04.7, K11.3, K12.2, K23.0, K35-K37, K57.0, K57.2, K57.4, K57.8, K61, K63.0, K65.0, K65.9, K67, K75.0, K77.0, K81, L00-L08, L30.3, L70.2, M00-M01, M03, M46.2-M46.5, M49.0-M49.3, M60.0, M63.0-M63.2, M65.0-M65.1, M68.0, M71.0-M71.1, M86, M90.0-M90.2, N08.0, N10, N11.0-N11.1, N11.8, N12, N13.6, N15.1, N16.0, N29.0-N29.1, N30.0-N30.3, N33-N34, N35.1, N39.0, N41, N43.1, N45, N48.1-N48.2, N49, N51, N61, N70-N74, N75.1, N76.0-N76.4, N77.0-N77.1, N98.0, O03.0, O03.5, O04.0, O04.5, O05.0, O05.5, O08.0, O23, O85, O86, O91, O98, R00, R01, R02, R50.8, R50.9, R57.2, T79.3, T80.2, T81.4, T82.6, T82.7, T83.5-T83.6, T84.5-T84.7, T85.7, T87.4, T88.0 |
| Dialysis-related  | 567, 996.62, 996.68, 996.69                                                                                                                                                                                                                                                                                                                                                                                                                                                                                                                                                                                                                                                                                                                     | T82.7, T85.7, K65.0, K65.9                                                                                                                                                                                                                                                                                                                                                                                                                                                                                                                                                                                                                                                                                                                                                                                                                                                                                                                                                                                                                                                                                                                                                                                     |
| Pneumonia         | 480-486, 487.0                                                                                                                                                                                                                                                                                                                                                                                                                                                                                                                                                                                                                                                                                                                                  | J12-J18, J10.0, J11.0, J85.1                                                                                                                                                                                                                                                                                                                                                                                                                                                                                                                                                                                                                                                                                                                                                                                                                                                                                                                                                                                                                                                                                                                                                                                   |
| Septicemia        | 003.1, 022.3, 036.2, 038, 054.5, 112.5, 790.7, 785.52                                                                                                                                                                                                                                                                                                                                                                                                                                                                                                                                                                                                                                                                                           | A40 -A41, O85, A02.1, A22.7, A26.7, A32.7, A39.2, A39.3-A39.4, A42.7, B37.7, R57.2                                                                                                                                                                                                                                                                                                                                                                                                                                                                                                                                                                                                                                                                                                                                                                                                                                                                                                                                                                                                                                                                                                                             |
