# Supplementary material
Source: PubMed Central journal article supplement (PMC4084745)
Supplement: supp_2.2.E109_2012-0027-02-at.pdf [file supp_2.2.E109_2012-0027-02-at.pdf]

**Table S2.** ICD-9 and ICD-10 codes for assessment of comorbidities.

| <b>Definition</b>           | <b>ICD-9 codes</b>                                                          | <b>ICD-10 codes</b>                                                                                                                                              |
|-----------------------------|-----------------------------------------------------------------------------|------------------------------------------------------------------------------------------------------------------------------------------------------------------|
| Cardiovascular disease      | 410, 411 (except 411.0), 412, 413.0, 413.9, 414 (except 414.1)              | I21, I24 (except I24.1), I25, I20.0, I20.9, I25 (except I25.3 and I25.4)                                                                                         |
| Cerebrovascular disease     | 430-432, 434, 436, 438, (342, 433, 435, or 438) and V57, 433 and 342, 435   | I60-I62, I64, I66, I69, I73, G45, I63.3-I63.9, G45, G46.0, G46.6, G46.7, (I65, I63.0-I63.2, or I66.3) and Z50, (I65, I63.0-I63.2, or I66.3) and G81, G81 and Z50 |
| Congestive heart failure    | 428, 402.01, 402.11, 402.91, 404.01, 404.11, 404.91, 404.03, 404.13, 404.93 | I50                                                                                                                                                              |
| Chronic pulmonary disease   | 492, 493, 496                                                               | J43, J44, J45                                                                                                                                                    |
| Diabetes                    | 250, 357.2, 362.0, 366.41                                                   | E10 -E14, G63.2, H36.0, H28.0                                                                                                                                    |
| Malignancy                  | 140-209 (except 173)                                                        | C00 -C97 (except C44, C46)                                                                                                                                       |
| Peripheral vascular disease | 250.7, 440.2-440.3, 440.8-440.9, 443, 785.4                                 | E10.5, E11.5, E13.5, E14.5, I70.2, I70.8-I70.9, I73, R02                                                                                                         |
